# Supplementary material for: Environment-dependent degradation pathways of pure zinc induced by acid–alkali surface chemistry
Source: Royal Society of Chemistry journal article supplement (doi:10.1039/d6ra00345a), 2026-04-21
Supplement: d6ra00345a1.pdf [file d6ra00345a1.pdf]

## Supporting Information

For

### Environment-dependent degradation pathways of pure zinc induced by acid– alkali surface chemistry

Abdalla Abdal-hay<sup>1\*</sup>, Enmao Xiang<sup>1</sup>, Yahia Ali<sup>2</sup>, Jiaqi Xu, Yu Kyoung Kim<sup>4</sup>

<sup>1</sup>Centre for Orofacial Regeneration, Reconstruction and Rehabilitation (COR3),

School of Dentistry, The University of Queensland, Brisbane 4006, Australia;

<sup>2</sup>Centre for Advanced Materials Processing and Manufacturing (AMPAM), School of

Mechanical and Mining Engineering, The University of Queensland, Brisbane, Qld,

4072, Australia<sup>3</sup>The Conversationalist Club & Department of Dental Digitalization,

School of Stomatology, Shandong First Medical University, Jinan 250117, Shandong,

China.

<sup>4</sup>Chonbuk National University, Institute of Oral Bioscience and School of Dentistry,

Jeon Ju, South Korea;

**Corresponding author:** Email: [abdalla.ali@uq.edu.au](mailto:abdalla.ali@uq.edu.au)

**Keywords:** Biodegradable zinc; Bone regeneration; Degradation behaviour; Simulated  
physiological solutions; Surface modification

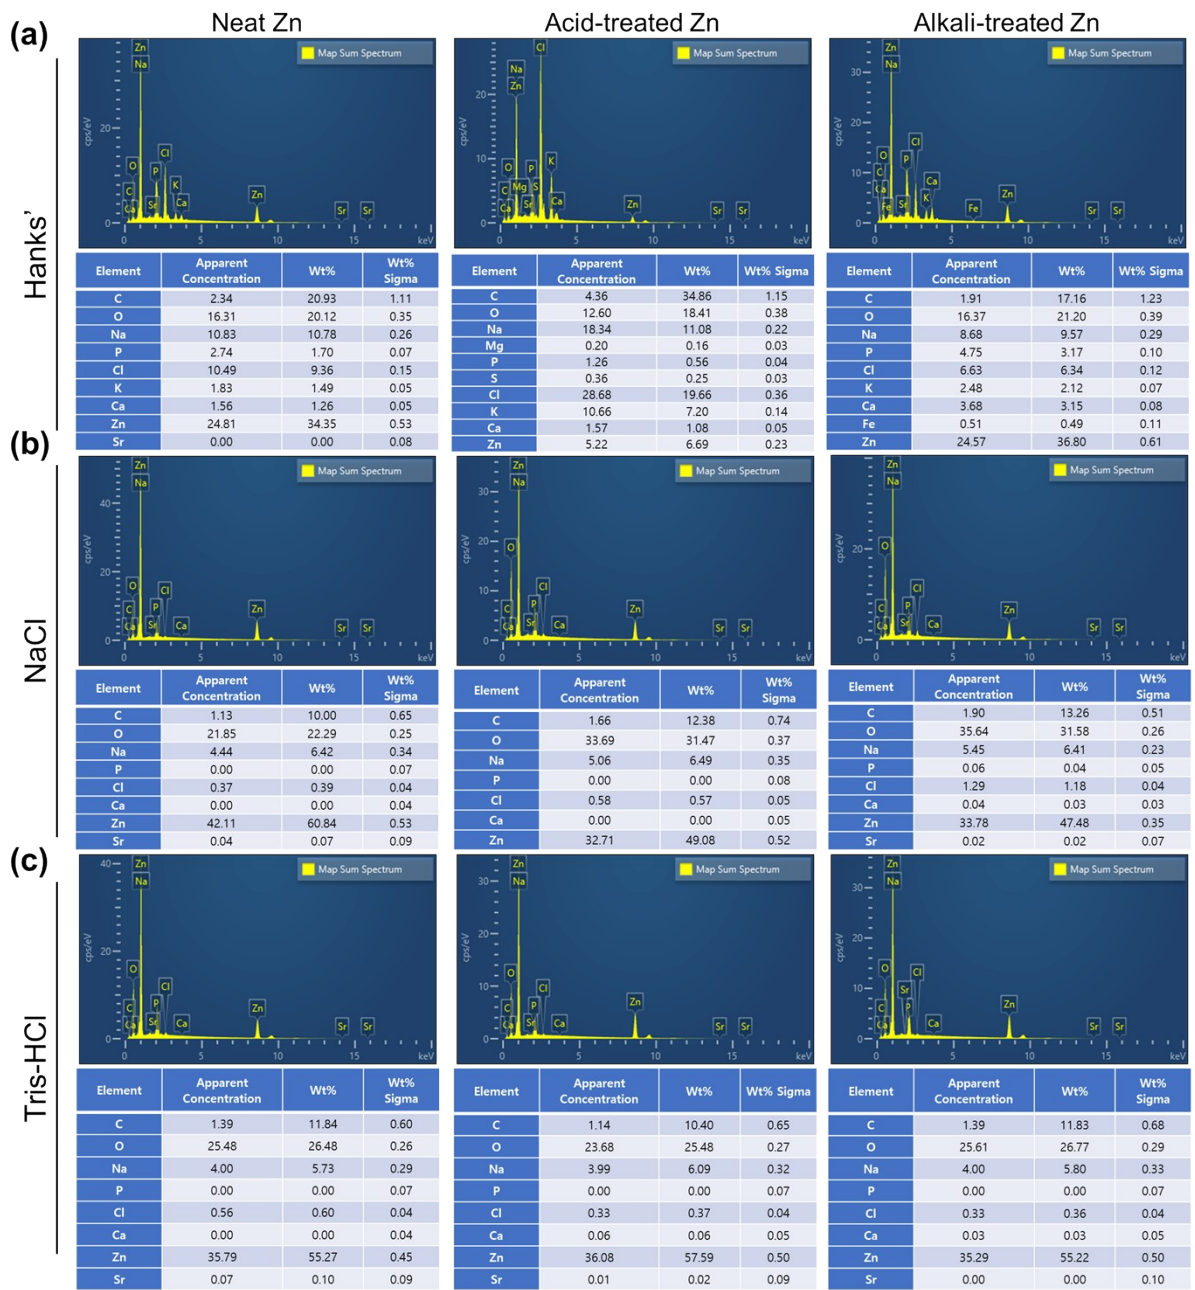

**Fig. S1.** SEM-EDX profiles and element composition of neat (untreated) and chemically treated Zn samples after immersion for 28 days at 37°C in the (a) HBSS, (b) NaCl, (c) Tris-HCl.

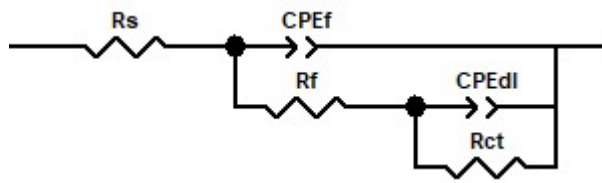

**Figure S2.** The equivalent electrical circuit model.
